# Supplementary material for: Synthesis of an amphiphilic block copolymer containing zwitterionic sulfobetaine as a novel pH-sensitive drug carrier
Source: Royal Society of Chemistry journal article supplement (doi:10.1039/c3py01325a), 2013-11-15
Supplement: c3py01325a.pdf [file c3py01325a.pdf]

# Supplementary data

## Synthesis of amphiphilic block copolymer containing zwitterionic sulfobetaine as a novel pH-sensitive drug carrier

Shuying Zhai <sup>a</sup>, Yuhao Ma <sup>a</sup>, Yingying Chen <sup>a</sup>, Dan Li <sup>a</sup>, Jun Cao <sup>a</sup>, Yanjun Liu <sup>a</sup>,  
Mengtian Cai <sup>a</sup>, Xiaoxiong Xie <sup>a</sup>, Yuanwei Chen <sup>a</sup> and Xianglin Luo <sup>a,b,\*</sup>

<sup>a</sup> College of Polymer Science and Engineering, Sichuan University, Chengdu 610065,  
People's Republic of China

<sup>b</sup> State Key Laboratory of Polymer Materials Engineering, Sichuan University,  
Chengdu 610065, People's Republic of China

\*Corresponding author. Tel.: +86 28 85466166; fax: +86 28 85466166.

E-mail addresses: luoxl\_scu@126.com.

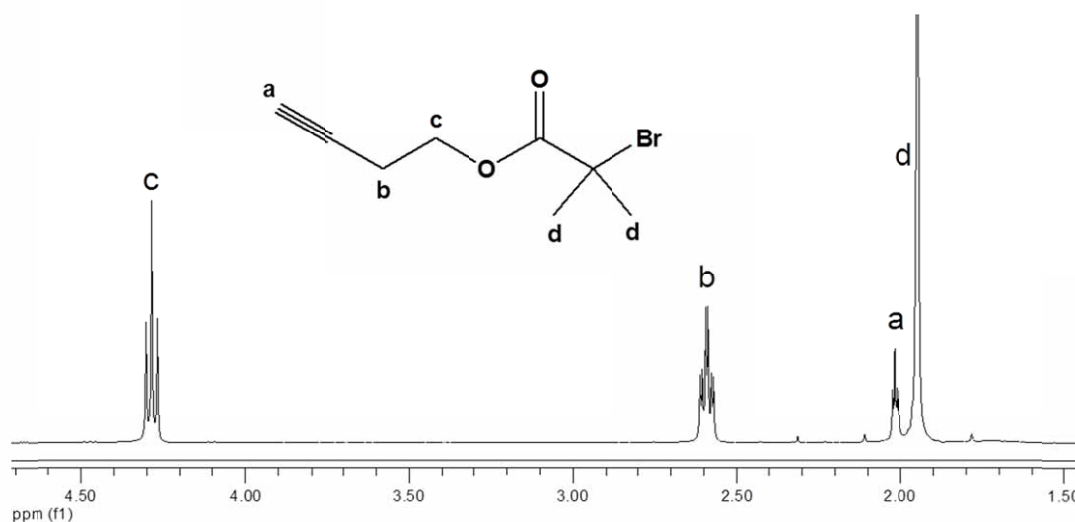

Supplementary Figure.S1 <sup>1</sup>H NMR spectra of 3-butynyl 2-bromoisbutyrate in CDCl<sub>3</sub>.

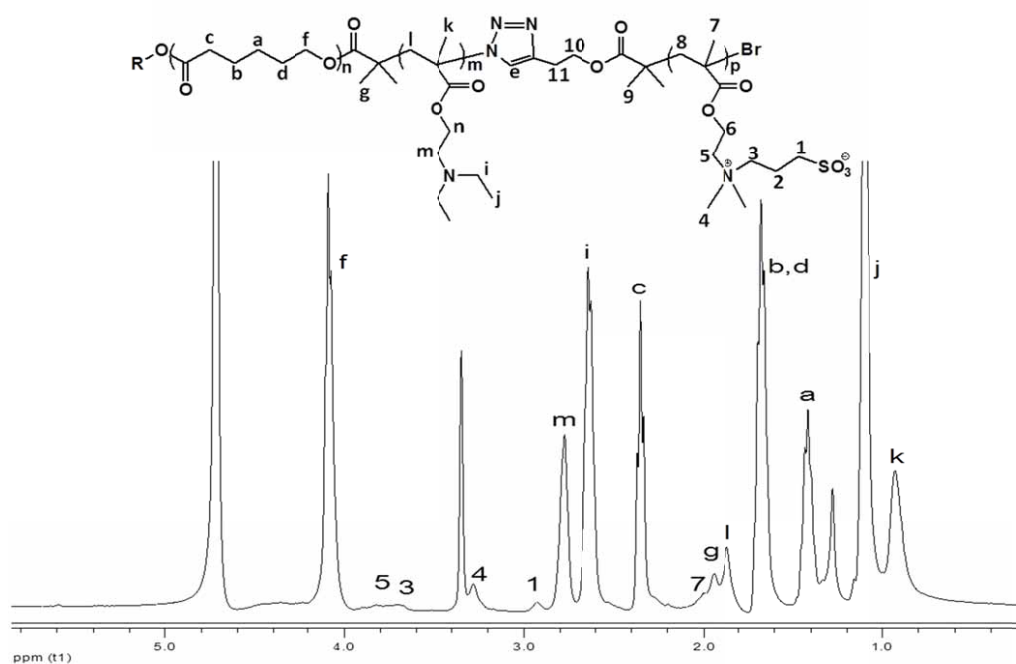

Supplementary Figure. S2 <sup>1</sup>H NMR spectra of PCL-PDEA-PSBMA in CDCl<sub>3</sub>/CD<sub>3</sub>OD (v/v=1:1) mixture.

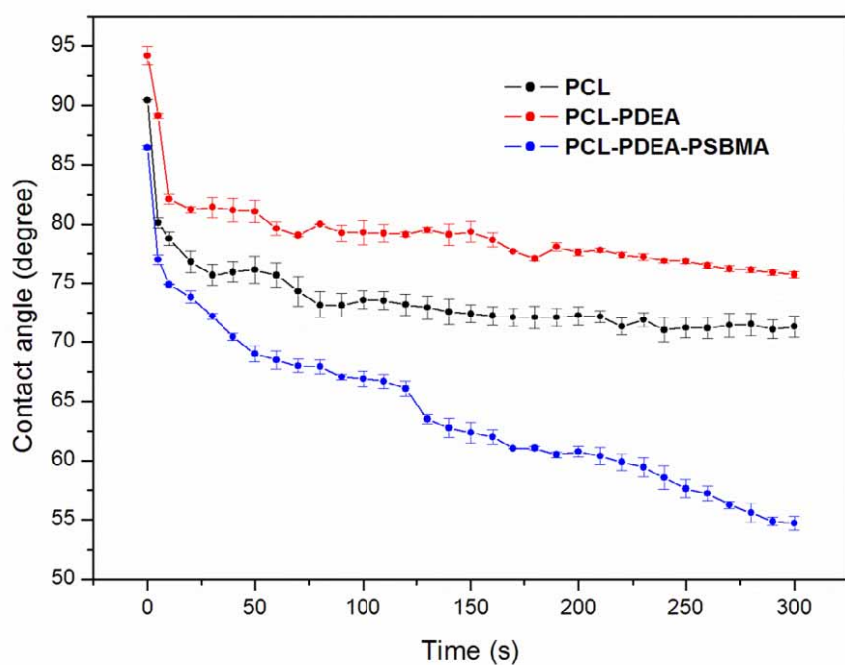

Supplementary Figure. S3 Evolution of the contact angle for PCL, PCL-PDEA and PCL-PDEA-PSBMA.

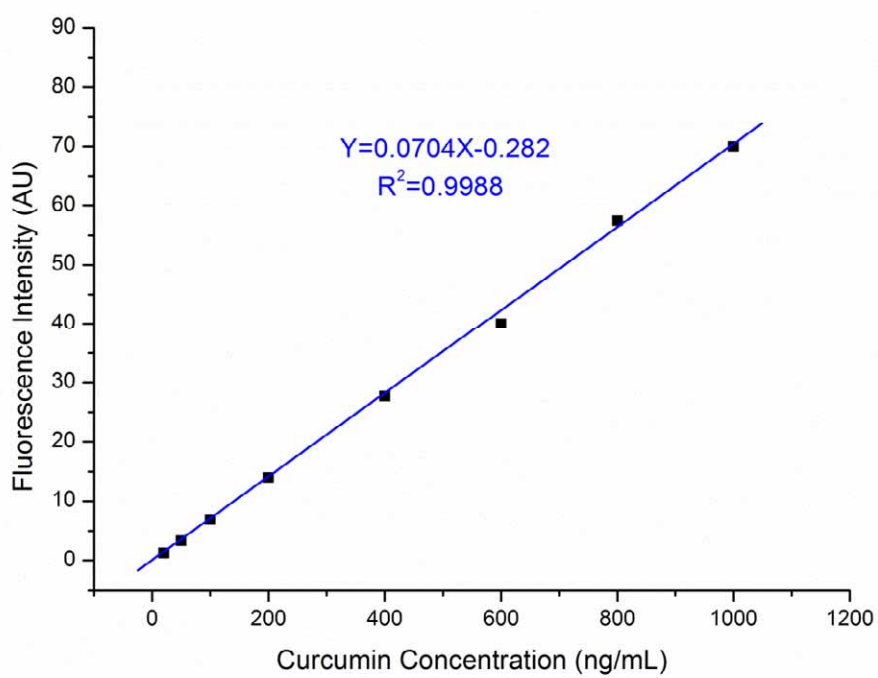

Supplementary Figure. S4 Curcumin standard curve in blood.
